# Supplementary material
Source: publisher site journal article supplement (http://www.kjim.org/upload/media/kjim-2016-293-suppl3.pdf)
Supplement: Supplementary file 1 [file kjim-2016-293-suppl3.pdf]

**Supplementary Table 3. Univariate analysis for OS and PFS by the Kaplan-Meier method**

| Variable              | OS, mon,<br>median ± SD | 95% CI, mon | p value | PFS, mon,<br>median ± SD | 95% CI, mon | p value |
|-----------------------|-------------------------|-------------|---------|--------------------------|-------------|---------|
| Postchemotherapy NLR  |                         |             | < 0.001 |                          |             | < 0.001 |
| < 3.00                | 14.90 ± 0.78            | 13.37–16.44 |         | 7.53 ± 0.29              | 6.97–8.10   |         |
| ≥ 3.00                | 8.73 ± 0.44             | 7.88–9.59   |         | 3.33 ± 0.16              | 3.02–3.65   |         |
| Postchemotherapy mGPS |                         |             | < 0.001 |                          |             | < 0.001 |
| Low <sup>a</sup>      | 14.33 ± 0.62            | 13.12–15.55 |         | 7.33 ± 0.30              | 6.75–7.92   |         |
| High <sup>b</sup>     | 8.23 ± 0.66             | 6.93–9.53   |         | 3.17 ± 0.30              | 2.57–3.76   |         |

OS, overall survival; PFS, progression-free survival; SD, standard deviation; CI, confidence interval; NLR, neutrophil-to-lymphocyte ratio; mGPS, modified Glasgow prognostic score.

<sup>a</sup>Low in mGPS are 0 or 1 scores.

<sup>b</sup>High in mGPS is 2 score.
